# Supplementary material for: Invariant object recognition is a personalized selection of invariant features in humans, not simply explained by hierarchical feed-forward vision models
Source: PubMed Central journal article supplement (PMC5663844; doi:10.1038/s41598-017-13756-8), 2017-10-31
Supplement: 41598_2017_13756_MOESM1_ESM.pdf [file 41598_2017_13756_MOESM1_ESM.pdf]

## Invariant object recognition is a personalized selection of invariant features in humans, not simply explained by hierarchical feed-forward vision models

Hamid Karimi-Rouzbahani, Nasour Bagheri, Reza Ebrahimpour

| Car model<br>Car part | Car 1                                                                               | Car 2                                                                                | Car 3                                                                                 |
|-----------------------|-------------------------------------------------------------------------------------|--------------------------------------------------------------------------------------|---------------------------------------------------------------------------------------|
| Floor                 |    |    |    |
| Roof                  |    |    |    |
| Door                  |    |    |    |
| Hood                  |    |    |    |
| Rear fender           |    |    |    |
| Trunk / Box           |    |    |    |
| Front fender          |    |    |    |
| Front wheel           |   |   |   |
| Windshield            |  |  |  |
| Rear window           |  |  |  |
| Rear wheel            |  |  |  |
| Rear post             |  |  |  |
| Window                |  |  |  |
| Rear bumper           |  |  | N.A.                                                                                  |
| Grille                |  |  |  |
| Exhaust               |  |  |  |
| Front bumper          |  |  | N.A.                                                                                  |
| Quarter window        |  |  | N.A.                                                                                  |
| Outside mirror        |  |  | N.A.                                                                                  |
| Tail lights           |  |  | N.A.                                                                                  |
| Front post            |  |  |  |
| Middle post           |  |  | N.A.                                                                                  |
| Headlights            |  |  |  |

**Supplementary Table S1.** Car parts with their corresponding names which are mentioned throughout the paper. The 3D car models used to generate these images are available under a Creative Commons Attribution-ShareAlike 3.0 Unported License (<https://creativecommons.org/licenses/by-sa/3.0/>) and were freely downloaded from (<https://grey.colorado.edu/CompCogNeuro/index.php/CU3D>).
